# Supplementary material for: Vestibular rehabilitation therapy on balance and gait in patients after stroke: a systematic review and meta-analysis
Source: Springer Nature journal article supplement (doi:10.1186/s12916-023-03029-9), 2023-08-25

(A) FM-B

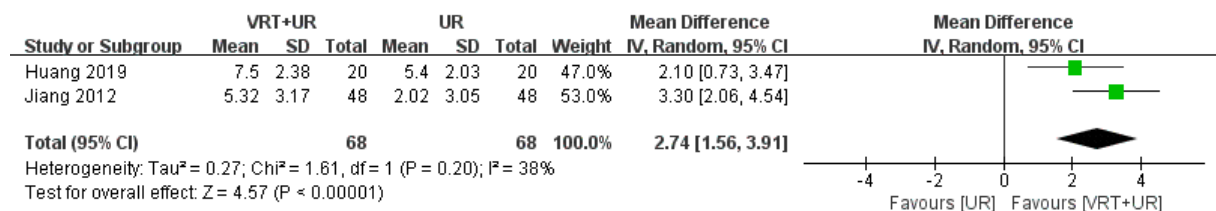

(B) ABC

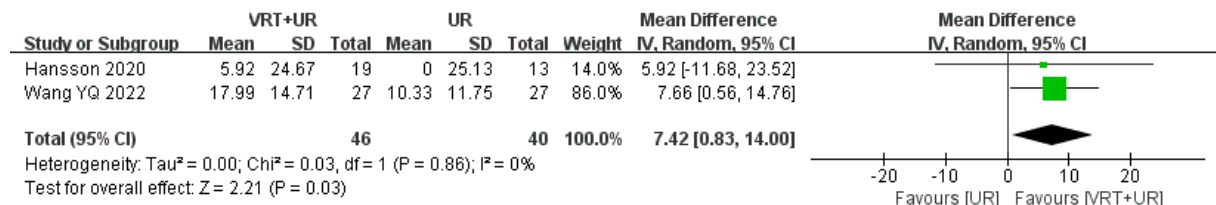

(C) COP movement area with eyes open

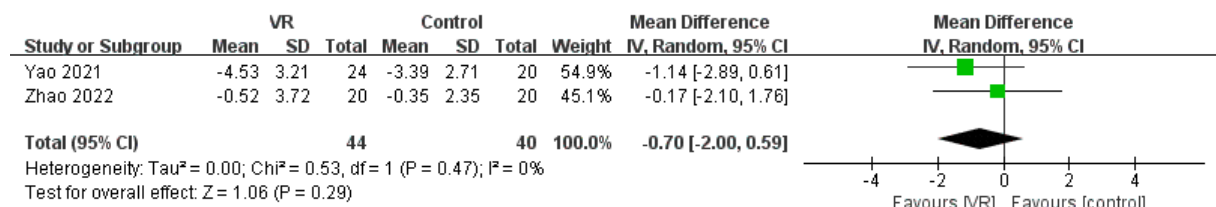

(D) COP movement area with eyes closed

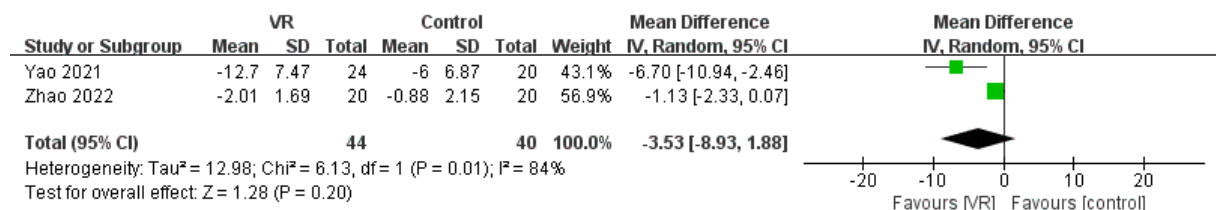

(E) Number of falls

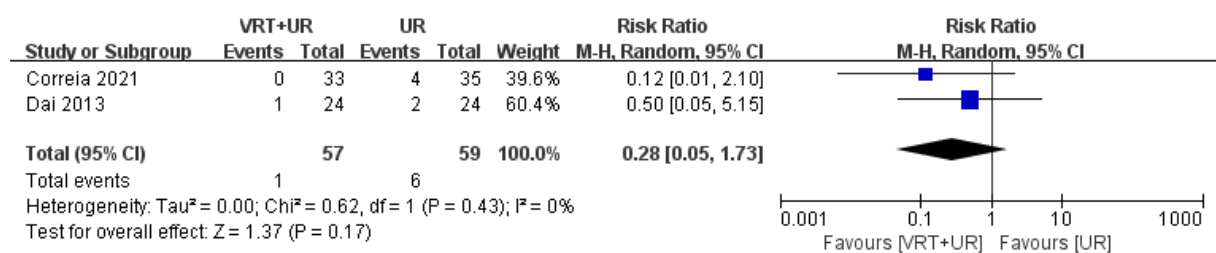

Supplement: MOESM4 [file 25964388]
